# Supplementary figures and images for: Diversity and Evolution of DNA Transposons Targeting Multicopy Small RNA Genes from Actinopterygian Fish
Source: MDPI journal article supplement (doi:10.3390/biology11020166), 2022-01-20

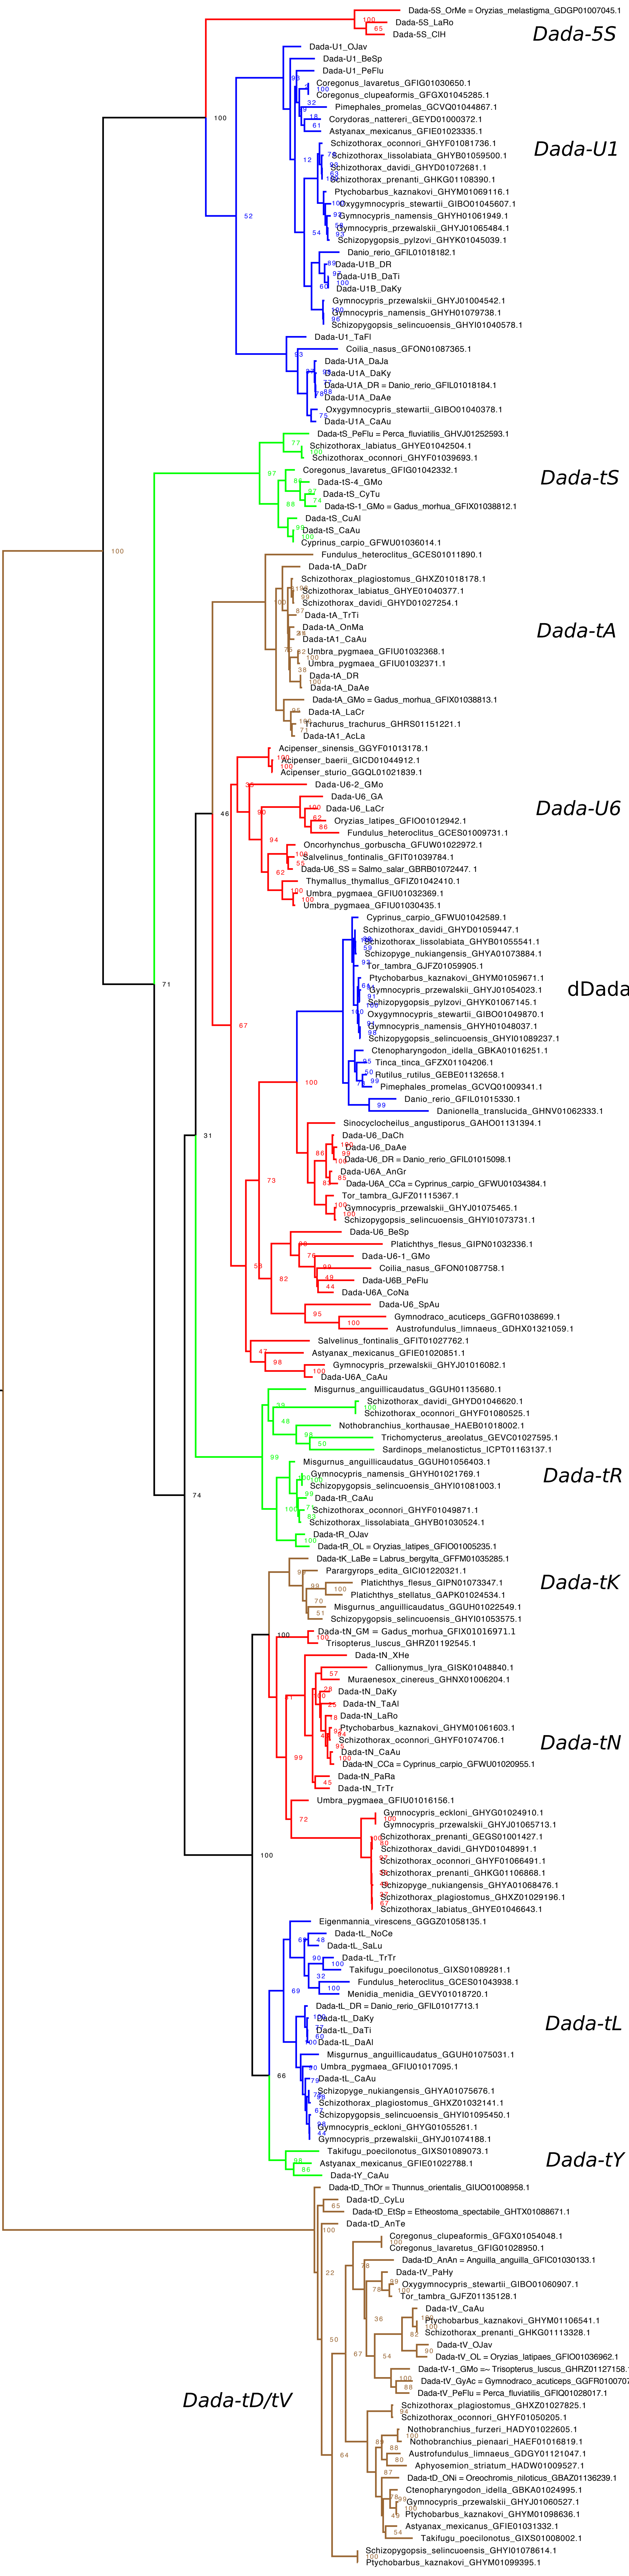

Supplement: s1 [file s1]
